# Supplementary material
Source: MDPI journal article supplement (https://www.mdpi.com/2039-7283/14/3/66)
Supplement: s1 [file s1]

## Supplementary Materials

**Table S1.** Quality assessment of the included prospective cohort studies using the Newcastle-Ottawa scale.

|                   | Question                                                                                                                                              | 1 | 2 | 3 | 4 | 5 | 6 |
|-------------------|-------------------------------------------------------------------------------------------------------------------------------------------------------|---|---|---|---|---|---|
| Selection (4)     |                                                                                                                                                       |   |   |   |   |   |   |
| 1                 | Representativeness of the Exposed Cohort                                                                                                              |   |   |   |   |   |   |
|                   | a) Truly representative of the average patient in the target population in the community*                                                             | * |   | * | * |   |   |
|                   | b) Somewhat representative of the average patient in the target population in the community*                                                          |   | * |   |   | * | * |
|                   | c) Selected group of users e.g. nurses, volunteers                                                                                                    |   |   |   |   |   |   |
|                   | d) No description of the derivation of the cohort                                                                                                     |   |   |   |   |   |   |
| 2                 | Selection of the Non-Exposed Cohort                                                                                                                   |   |   |   |   |   |   |
|                   | a) Drawn from the same community as the exposed cohort*                                                                                               | * | * | * | * | * | * |
|                   | b) Drawn from a different source                                                                                                                      |   |   |   |   |   |   |
|                   | c) No description of the derivation of the non-exposed cohort                                                                                         |   |   |   |   |   |   |
| 3                 | Ascertainment of Exposure                                                                                                                             |   |   |   |   |   |   |
|                   | a) Secure record (eg, medical records)*                                                                                                               | * | * | * | * | * | * |
|                   | b) Structured interview*                                                                                                                              |   |   |   |   |   |   |
|                   | c) Written self-report                                                                                                                                |   |   |   |   |   |   |
|                   | d) No description                                                                                                                                     |   |   |   |   |   |   |
| 4                 | Demonstration that Outcome of Interest Was Not Present at Start of Study                                                                              |   |   |   |   |   |   |
|                   | a) Yes*                                                                                                                                               |   | * | * | * | * | * |
|                   | b) No                                                                                                                                                 | - |   |   |   |   |   |
| Comparability (2) |                                                                                                                                                       |   |   |   |   |   |   |
| 5                 | Comparability of Cohorts on the Basis of the Design or Analysis                                                                                       |   |   |   |   |   |   |
|                   | a) Study controls for SES (or some reasonable proxy of SES), age, race, gender*                                                                       | * | * | * | * | * | * |
|                   | b) Study controls for any additional factor/s* (comorbidities, antibiotic intake or use, etc.)                                                        | * | * | * | * | * | * |
|                   | c) Inadequate degree of control                                                                                                                       |   |   |   |   |   |   |
| Outcome (3)       |                                                                                                                                                       |   |   |   |   |   |   |
| 6                 | Assessment of outcome                                                                                                                                 |   |   |   |   |   |   |
|                   | a) Independent or blind assessment stated in the paper, or confirmation of the outcome by reference to secure records (x-rays, medical records, etc)* | * | * | * | * | * | * |
|                   | b) Record linkage (eg, identified through ICD codes on database records)*                                                                             |   |   |   |   |   |   |
|                   | c) Self-report (ie, no reference to original medical records or x-rays to confirm the outcome)                                                        |   |   |   |   |   |   |
|                   | d) No description                                                                                                                                     |   |   |   |   |   |   |
| 7                 | Was Follow-up Long Enough for Outcomes to Occur?                                                                                                      |   |   |   |   |   |   |
|                   | a) Yes (select an adequate follow up period for outcome of interest)*                                                                                 |   | * |   | * | * | * |
|                   | b) No                                                                                                                                                 | - |   | - |   |   |   |
| 8                 | Adequacy of Follow-up of Cohorts                                                                                                                      |   |   |   |   |   |   |
|                   | a) Complete follow-up – all subjects accounted for*                                                                                                   |   |   |   |   |   |   |

|                    |                                                                                                                                                      |   |   |   |   |   |   |
|--------------------|------------------------------------------------------------------------------------------------------------------------------------------------------|---|---|---|---|---|---|
|                    | b) Subjects lost to follow-up unlikely to introduce bias—small number lost (LESS than 10% loss-to-follow up, or description provided of those lost)* |   |   |   |   |   |   |
|                    | c) Follow-up rate MORE than 80% and no description of those lost                                                                                     |   |   |   |   |   |   |
|                    | d) No statement                                                                                                                                      | - | - | - | - | - | - |
| Score              |                                                                                                                                                      | 6 | 8 | 7 | 8 | 8 | 8 |
| Quality Assessment |                                                                                                                                                      | M | H | H | H | H | H |

1. Qing et al., 2019; 2. Imahashi et al., 2021; 3. Dong et al., 2021; 4. Ishizaka et al., 2021; 5. Ji et al., 2018; 6. Ishizaka et al., 2021

\* = Quality met, H = High quality, M = Moderate quality

**Table S2.** Quality assessment of the included cross-sectional studies using the Newcastle-Ottawa scale.

|                   | Question                                                                                                                            | 1  | 2  | 3  | 4  | 5  | 6  | 7  | 8 |
|-------------------|-------------------------------------------------------------------------------------------------------------------------------------|----|----|----|----|----|----|----|---|
| Selection (5)     |                                                                                                                                     |    |    |    |    |    |    |    |   |
| 1                 | Representativeness of the sample                                                                                                    |    |    |    |    |    |    |    |   |
|                   | a) Truly representative of the average in the target population.* (all subjects or random sampling)                                 |    |    |    | *  |    | *  | *  | * |
|                   | b) Somewhat representative of the average in the target population.* (non-random sampling)                                          | *  | *  | *  |    | *  |    |    |   |
|                   | c) Selected group of users or convenience sample e.g., volunteers, members, nurses                                                  |    |    |    |    |    |    |    |   |
|                   | d) No description of the sampling strategy                                                                                          |    |    |    |    |    |    |    |   |
| 2                 | Sample size                                                                                                                         |    |    |    |    |    |    |    |   |
|                   | a) Justified and satisfactory.*                                                                                                     |    |    |    |    |    |    |    |   |
|                   | b) Not justified.                                                                                                                   | -  | -  | -  | -  | -  | -  | -  | - |
| 3                 | Non-respondents                                                                                                                     |    |    |    |    |    |    |    |   |
|                   | a) Comparability between respondents and non-respondents characteristics is established, and the response rate is satisfactory.*    | *  | *  |    | *  | *  | *  | *  | * |
|                   | b) The response rate is unsatisfactory, or the comparability between respondents and non-respondents is unsatisfactory.             |    |    |    |    |    |    |    |   |
|                   | c) No description of the response rate or the characteristics of the responders and the non-responders.                             |    |    | -  |    |    |    |    |   |
| 4                 | Ascertainment of the exposure (risk factor)                                                                                         |    |    |    |    |    |    |    |   |
|                   | a) Validated measurement tool.**                                                                                                    | ** | ** | ** | ** | ** | ** | ** | * |
|                   | b) Non-validated measurement tool, but the tool is available or described.*                                                         |    |    |    |    |    |    |    |   |
|                   | c) No description of the measurement tool.                                                                                          |    |    |    |    |    |    |    |   |
| Comparability (2) |                                                                                                                                     |    |    |    |    |    |    |    |   |
| 5                 | The subjects in different outcome groups are comparable, based on the study design or analysis. Confounding factors are controlled. |    |    |    |    |    |    |    |   |
|                   | a) The study controls for the most important factor (age, sex, risk factors).*                                                      | *  | *  | -  | *  | *  | *  | *  | * |
|                   | b) The study control for any additional factor (comorbidities, antibiotic intake).*                                                 | *  | -  | *  | *  | *  | -  | *  | * |
| Outcome (3)       |                                                                                                                                     |    |    |    |    |    |    |    |   |
| 6                 | Assessment of the outcome                                                                                                           |    |    |    |    |    |    |    |   |
|                   | a) Independent or blind assessment.**                                                                                               | ** | ** | ** | ** | ** | ** | ** | * |
|                   | b) Record linkage.**                                                                                                                |    |    |    |    |    |    |    |   |
|                   | c) Self report.*                                                                                                                    |    |    |    |    |    |    |    |   |
|                   | d) No description                                                                                                                   |    |    |    |    |    |    |    |   |
| 7                 | Statistical test                                                                                                                    |    |    |    |    |    |    |    |   |

|                    |                                                                                                                                                                                                                  |   |   |   |   |   |   |   |   |
|--------------------|------------------------------------------------------------------------------------------------------------------------------------------------------------------------------------------------------------------|---|---|---|---|---|---|---|---|
|                    | a) The statistical test used to analyze the data is clearly described and appropriate, and the measurement of the association is presented, including confidence intervals and the probability level (p-value).* | * | * | * | * | * | * | * | * |
|                    | b) The statistical test is not appropriate, not described or incomplete.                                                                                                                                         |   |   |   |   |   |   |   |   |
| Score              |                                                                                                                                                                                                                  | 9 | 8 | 7 | 9 | 9 | 8 | 9 | 9 |
| Quality Assessment |                                                                                                                                                                                                                  | H | H | M | H | H | H | H | H |

1. Zhou et al., 2018; 2. Xie et al., 2021; 3. Mingjun et al., 2022; 4. Lu et al., 2021; 5. Mak et al., 2021; 6. Zhu et al., 2022; 7. Ling et al., 2016; 8. Jayanama et al., 2022

\* = Quality met, H = High quality, G = Moderate quality

**Table S3.** Quality assessment of the included case-control study using the Newcastle-Ottawa scale.

|                    | Question                                                                            | Zhang et al., 2023 |
|--------------------|-------------------------------------------------------------------------------------|--------------------|
| Selection (4)      |                                                                                     |                    |
| 1                  | Is the case definition adequate?                                                    |                    |
|                    | a) yes, with independent validation*                                                | *                  |
|                    | b) yes, e.g., record linkage or based on self-reports                               |                    |
|                    | c) no description                                                                   |                    |
| 2                  | Representativeness of the cases                                                     |                    |
|                    | a) consecutive or obviously representative series of cases*                         | *                  |
|                    | b) potential for selection biases or not stated                                     |                    |
| 3                  | Selection of Controls                                                               |                    |
|                    | a) community controls*                                                              | *                  |
|                    | b) hospital controls                                                                |                    |
|                    | c) no description                                                                   |                    |
| 4                  | Definition of Controls                                                              |                    |
|                    | a) no history of diseases (endpoint)*                                               | *                  |
|                    | b) no description of sources                                                        |                    |
| Comparability (2)  |                                                                                     |                    |
| 5                  | Comparability of cases and controls on the basis of the design or analysis          |                    |
|                    | a) study controls for SES (age, sex, etc.) *                                        | *                  |
|                    | b) study controls for any additional factor (comorbidities, antibiotic use, etc.) * | -                  |
| Exposure (3)       |                                                                                     |                    |
| 6                  | Ascertainment of exposure                                                           |                    |
|                    | a) secure record (e.g., surgical records)*                                          | *                  |
|                    | b) structured interview where blind to case-control status*                         |                    |
|                    | c) interview not blinded to case-control status                                     |                    |
|                    | d) written self-report or medical record only                                       |                    |
|                    | e) no description                                                                   |                    |
| 7                  | Same method of ascertainment for cases and controls                                 |                    |
|                    | a) yes*                                                                             | *                  |
|                    | b) no                                                                               |                    |
| 8                  | Non-Response rate                                                                   |                    |
|                    | a) same rate for both groups*                                                       | *                  |
|                    | b) non respondents described                                                        |                    |
|                    | c) rate different and no designation                                                |                    |
| Score              |                                                                                     | 8                  |
| Quality Assessment |                                                                                     | H                  |

\* = Quality met, H = High quality

**Table S4.** Gut microbiome composition and analysis among PLHIV in the Asia-Pacific region.

| Reference             | Gut microbiota findings                                                                                                                                                                                                                                                                                                                                                                                                                                                                                                                                                                                                                                                                                                                                                                                                                                                                                                                              | Diversity analysis                                                                                                                                                                                                                                                                                                                                                                                                                                                                                                         | Related microbiome outcomes and analyses                                                                                                                                                                                                                                                                                                                                                                                                                                                                                                                                                                                                                      |
|-----------------------|------------------------------------------------------------------------------------------------------------------------------------------------------------------------------------------------------------------------------------------------------------------------------------------------------------------------------------------------------------------------------------------------------------------------------------------------------------------------------------------------------------------------------------------------------------------------------------------------------------------------------------------------------------------------------------------------------------------------------------------------------------------------------------------------------------------------------------------------------------------------------------------------------------------------------------------------------|----------------------------------------------------------------------------------------------------------------------------------------------------------------------------------------------------------------------------------------------------------------------------------------------------------------------------------------------------------------------------------------------------------------------------------------------------------------------------------------------------------------------------|---------------------------------------------------------------------------------------------------------------------------------------------------------------------------------------------------------------------------------------------------------------------------------------------------------------------------------------------------------------------------------------------------------------------------------------------------------------------------------------------------------------------------------------------------------------------------------------------------------------------------------------------------------------|
| Qing et al., 2019[22] | <p>PLHIV compared to healthy controls showed the following changes:</p> <ul style="list-style-type: none"> <li>- Increased: Proteobacteria, <i>Moraxellaceae</i>, and <i>Psychrobacter</i> spp.</li> <li>- Decreased: Bacteroidetes (<i>Rikenellaceae</i> and <i>Alistipes</i> spp.), Firmicutes (<i>Roseburia</i> spp., <i>Lachnospiraceae</i>, <i>Ruminococcaceae</i>) and <i>Microbacteriaceae</i></li> </ul>                                                                                                                                                                                                                                                                                                                                                                                                                                                                                                                                     | <p>Alpha-diversity</p> <ul style="list-style-type: none"> <li>- Lower diversity among PLHIV based on Chao1 and Shannon indices but not significant compared to healthy controls</li> </ul>                                                                                                                                                                                                                                                                                                                                 | <p>CD8+ T-cells have the following associations:</p> <ul style="list-style-type: none"> <li>- Positive: Proteobacteria such as <i>Oxalobacter</i>, <i>Undibacterium</i>, <i>Burkholderia</i>, <i>Achromobacter</i>, <i>Ramlibacter</i>, and <i>Sphingobacteria</i></li> </ul> <p>No significant correlation between CD4+ T-cells and intestinal flora.</p> <p>SCFAs such as butyric and valeric acid have the following associations:</p> <ul style="list-style-type: none"> <li>- Positive: Bacteroidetes (<i>Rikenellaceae</i> and <i>Alistipes</i> spp.) and Firmicutes (<i>Roseburia</i> spp., <i>Lachnospiraceae</i>, <i>Ruminococcaceae</i>)</li> </ul> |
| Zhou et al., 2018[23] | <p>PLHIV compared to healthy controls showed the following associations:</p> <ul style="list-style-type: none"> <li>- Positive: Proteobacteria and Firmicutes</li> <li>- Negative: Bacteroidetes</li> </ul> <p>Changes in population in PLHIV compared to healthy controls:</p> <ul style="list-style-type: none"> <li>- Increased: Proteobacteria, <i>Enterococcus</i>, <i>Lachnoclostridium</i>, <i>Streptococcus</i>, <i>Lactobacillus</i>, <i>Ruminococcus</i> and <i>Streptococcus vestibularis</i></li> <li>- Decreased: Bacteroidetes, <i>Prevotella</i>, <i>Megamonas</i>, <i>Dialister</i>, <i>Ruminiclostridium</i>, <i>Faecalibacterium</i>, <i>Ruminococcus</i>, <i>Lachnospira</i>, <i>Roseburia</i>, <i>Blautia</i>, etc.</li> </ul> <p>PLHIV on ART compared to naïve showed the following changes:</p> <ul style="list-style-type: none"> <li>- Increased: <i>Bacteroides</i>, <i>Blautia</i> and <i>Faecalibacterium</i></li> </ul> | <p>Alpha-diversity</p> <ul style="list-style-type: none"> <li>- PLHIV have significantly decreased diversity based on richness estimators (PD_whole tree and observed species) and diversity index (Simpson, Shannon index)</li> <li>- PLHIV on ART have significant increase in diversity compared to naïve based on Shannon index</li> </ul> <p>Beta-diversity</p> <ul style="list-style-type: none"> <li>- PLHIV with or without ART have significantly different microbiota composition compared to healthy</li> </ul> | <p>Route of HIV transmission may have the following associations:</p> <ul style="list-style-type: none"> <li>- Homosexual transmission showed increased <i>Bacilli</i>, <i>Lactobacillales</i> and <i>Enterococcaceae</i></li> <li>- Heterosexual transmission showed increased abundance of <i>Prevotella</i>, <i>Lachnoclostridium</i>, <i>Phascolarctobacterium</i> and <i>Parabacteroides</i> compared with homosexual participants</li> <li>- Intravenous drug users showed increased <i>Enterobacteriales</i>, <i>Enterobacteriaceae</i>, <i>Lachnospiraceae</i>, <i>Streptococcaceae</i>, and <i>Lactobacillaceae</i></li> </ul>                       |
| Xie et al., 2021[24]  | <p>PLHIV IR compared to healthy showed the following changes:</p> <ul style="list-style-type: none"> <li>- Increased: Proteobacteria, Fusobacteria and Saccharibacteria phyla, <i>Lachnoclostridium</i>, <i>Megasphaera</i>, <i>Escherichia-Shigella</i>, <i>Veillonella</i>,</li> </ul>                                                                                                                                                                                                                                                                                                                                                                                                                                                                                                                                                                                                                                                             | <p>Beta-diversity</p> <ul style="list-style-type: none"> <li>- Significant differentiation of bacterial communities between IR and healthy and INR and healthy using PCoA</li> </ul>                                                                                                                                                                                                                                                                                                                                       | <p>Immune activation and response have the following associations:</p> <ul style="list-style-type: none"> <li>- Nadir CD4 count is positively correlated with <i>Ruminococcaceae</i> and <i>Alistipes</i>, negatively correlated with <i>Fusobacterium</i>. and negatively associated with <i>Roseburia</i> and <i>Blautia</i></li> </ul>                                                                                                                                                                                                                                                                                                                     |

|                          |                                                                                                                                                                                                                                                                                                                                                                                                                                                                                                                                                                                                                                                                                                                                                                                                                                                                                                                                                                                                                                                                                                                                                                                                                                                                                                                                                                                                                                                                                                                                                                                                                                     |                                                                                                                                                                 |                                                                                                                                                                                                                                                                                                                                                                                                                                                                                                                                                                                                                   |
|--------------------------|-------------------------------------------------------------------------------------------------------------------------------------------------------------------------------------------------------------------------------------------------------------------------------------------------------------------------------------------------------------------------------------------------------------------------------------------------------------------------------------------------------------------------------------------------------------------------------------------------------------------------------------------------------------------------------------------------------------------------------------------------------------------------------------------------------------------------------------------------------------------------------------------------------------------------------------------------------------------------------------------------------------------------------------------------------------------------------------------------------------------------------------------------------------------------------------------------------------------------------------------------------------------------------------------------------------------------------------------------------------------------------------------------------------------------------------------------------------------------------------------------------------------------------------------------------------------------------------------------------------------------------------|-----------------------------------------------------------------------------------------------------------------------------------------------------------------|-------------------------------------------------------------------------------------------------------------------------------------------------------------------------------------------------------------------------------------------------------------------------------------------------------------------------------------------------------------------------------------------------------------------------------------------------------------------------------------------------------------------------------------------------------------------------------------------------------------------|
|                          | <p><i>Streptococcus</i>, <i>Fusobacterium</i>, and <i>Ruminococcus gnavus</i> genera</p> <ul style="list-style-type: none"> <li>- Decreased: Bacteroidetes, Actinobacteria, Tenericutes and Lentisphaerae phyla, <i>Faecalibacterium</i>, <i>Eubacterium rectale</i>, <i>Alistipes</i>, <i>Subdoligranulum</i>, <i>Bifidobacterium</i>, <i>Roseburia</i>, <i>Ruminococcaceae</i> and <i>Parasutterella</i> genera</li> </ul> <p>PLHIV INR compared to healthy showed the following changes:</p> <ul style="list-style-type: none"> <li>- Increased: Proteobacteria, Fusobacteria, Tenericutes, Saccharibacteria; <i>Parasutterella</i>, <i>Megasphaera</i>, <i>Fusobacterium</i>, and <i>Ruminococcus gnavus</i></li> <li>- Decreased: <i>Faecalibacterium</i>, <i>Eubacterium rectale</i>, <i>Alistipes</i>, <i>Bifidobacterium</i>, <i>Blautia</i>, <i>Roseburia</i> and <i>Ruminococcaceae</i> genera</li> </ul> <p>Both IR and INR compared to healthy showed the following changes:</p> <ul style="list-style-type: none"> <li>- Increased: Proteobacteria, Fusobacteria, and Saccharibacteria</li> <li>- Decreased: Bacteroidetes, Actinobacteria and Lentisphaerae phyla, <i>Faecalibacterium</i>, <i>Alistipes</i>, <i>Bifidobacterium</i>, <i>Eubacterium rectale</i>, and <i>Roseburia</i> genera</li> </ul> <p>PLHIV IR compared to INR have the following associations:</p> <ul style="list-style-type: none"> <li>- Positive: <i>Escherichia-Shigella</i>, <i>Blautia</i>, and <i>Ruminococcus torques</i> group</li> <li>- Negative: <i>Eubacterium</i>, <i>Ruminoclostridium</i> 6, <i>Alloprevotella</i></li> </ul> | <p>by weighted UniFrac matrices</p> <ul style="list-style-type: none"> <li>- No significant differences between microbiota communities of IR and INR</li> </ul> | <ul style="list-style-type: none"> <li>- Current CD4 count is positively correlated with <i>Ruminococcaceae</i> and <i>Subdoligranulum</i> and negatively correlated with <i>Fusobacterium</i></li> <li>- CD4/CD8 ratio is positively correlated with <i>Faecalibacterium</i> and <i>Ruminococcaceae</i> and negative correlated with <i>Escherichia-Shigella</i>.</li> <li>- CD8+ CD57+ T-cells is positively correlated with <i>Escherichia-Shigella</i>, positively associated with <i>Roseburia</i> and <i>Blautia</i>, and negatively correlated with <i>Ruminococcaceae</i> and <i>Alistipes</i></li> </ul> |
| Mingjun et al., 2022[25] | PLHIV compared to healthy have the following changes and associations:                                                                                                                                                                                                                                                                                                                                                                                                                                                                                                                                                                                                                                                                                                                                                                                                                                                                                                                                                                                                                                                                                                                                                                                                                                                                                                                                                                                                                                                                                                                                                              | <p>Alpha-diversity</p> <ul style="list-style-type: none"> <li>- Lower diversity among PLHIV compared to healthy</li> </ul>                                      | CD4 count and cytokine levels showed the following associations:                                                                                                                                                                                                                                                                                                                                                                                                                                                                                                                                                  |

|                        |                                                                                                                                                                                                                                                                                                                                                                                                                                                                                                                                                                                                               |                                                                                                                                                                                                                                                                                                                                                                                                                                                                                                     |                                                                                                                                                                                                                                                                                                                                                                                                                                                                                                                                                                                                                                                                                                                                                 |
|------------------------|---------------------------------------------------------------------------------------------------------------------------------------------------------------------------------------------------------------------------------------------------------------------------------------------------------------------------------------------------------------------------------------------------------------------------------------------------------------------------------------------------------------------------------------------------------------------------------------------------------------|-----------------------------------------------------------------------------------------------------------------------------------------------------------------------------------------------------------------------------------------------------------------------------------------------------------------------------------------------------------------------------------------------------------------------------------------------------------------------------------------------------|-------------------------------------------------------------------------------------------------------------------------------------------------------------------------------------------------------------------------------------------------------------------------------------------------------------------------------------------------------------------------------------------------------------------------------------------------------------------------------------------------------------------------------------------------------------------------------------------------------------------------------------------------------------------------------------------------------------------------------------------------|
|                        | <ul style="list-style-type: none"> <li>- Increased: <i>Prevotella</i>, <i>Prevotellaceae</i>, <i>Fusobacteria</i>, <i>Bacteroidales</i>, <i>Klebsiella</i>, <i>Succinivibrionaceae</i>, <i>Succinivibrio</i></li> <li>- Decreased: <i>Firmicutes</i>, <i>Clostridia</i>, <i>Ruminococcaceae</i>, <i>Lachnospirales</i>, <i>Lachnospiraceae</i>, <i>Faecalibacterium</i>, <i>Agathobacter</i></li> <li>- <i>Fusobacterium</i> and <i>Escherichia-Shigella</i> were specific and highly abundant among PLHIV while <i>Subdoligranulum</i> was specific and highly abundant in the normal population.</li> </ul> | <p>based on observed species index, Chao1 index, ACE index, Shannon index, and Simpson index</p>                                                                                                                                                                                                                                                                                                                                                                                                    | <ul style="list-style-type: none"> <li>- High CD4 showed increase in <i>Veillonellales</i> and <i>Selenomonada</i> and decrease in <i>Clostridiaceae</i> and <i>Clostridiales</i> compared to low CD4</li> <li>- TNF-<math>\alpha</math> is positively correlated with <i>Fusobacterium_mortiferum</i>, <i>Fusobacterium</i>, and <i>Gammaproteobacteria</i> and negatively correlated with <i>Ruminococcaceae</i> and <i>Bacteroidales</i></li> <li>- IL-2 and IL-8 are positively correlated with <i>Agathobacter</i> and negatively correlated with <i>Prevotellaceae</i></li> </ul>                                                                                                                                                         |
| Lu et al., 2021[26]    | <p>PLHIV with Low CD4 compared to high CD4 have the following changes:</p> <ul style="list-style-type: none"> <li>- Increased: <i>Enterobacteriaceae</i>, <i>Fusobacteriaceae</i>, <i>Veillonellaceae</i> and <i>Prevotellaceae</i></li> <li>- Decreased: <i>Ruminococcaceae</i>, <i>Succinivibrionaceae</i>, and <i>Bacteroidaceae</i></li> </ul>                                                                                                                                                                                                                                                            | <p>Alpha-diversity</p> <ul style="list-style-type: none"> <li>- PLHIV with high CD4, compared to low CD4, has a significant decrease in microbial diversity based on Shannon index (P=0.0287) and non-significant decrease based on Simpson index (P=0.0987)</li> </ul> <p>Beta-diversity</p> <ul style="list-style-type: none"> <li>- There were no significant differences in microbial diversity between groups based on PCoA and NMDS analysis based on unweighted UniFrac distances</li> </ul> | <p>Clinical variables demonstrated the following associations:</p> <ul style="list-style-type: none"> <li>- CD4 count has a positive association with <i>Ruminococcaceae</i></li> <li>- CD4/CD8 ratio has a positive correlation with <i>Succinivibrionaceae</i> and negative correlation with <i>Veillonellaceae</i></li> <li>- TNF-<math>\alpha</math> has a negative association with <i>Ruminococcaceae</i></li> </ul> <p>Clinical variables and cytokine levels have the following associations:</p> <ul style="list-style-type: none"> <li>- CD4 count and CD4/CD8 ratio have negative correlations with TNF-<math>\alpha</math> and IL-1<math>\alpha</math></li> <li>- CD4 T cell count has a negative correlation with MCP-1</li> </ul> |
| Zhang et al., 2023[27] | <p>PLHIV compared to healthy controls showed the following changes:</p> <ul style="list-style-type: none"> <li>- Increased: <i>Lactobacillus</i>, <i>Enterococcus</i>, <i>Brevundimonas</i>, <i>Aeromonas</i> and <i>Pseudomonas</i></li> </ul> <p>AIDS compared to pre-AIDS PLHIV showed the following associations:</p>                                                                                                                                                                                                                                                                                     | <p>Beta-diversity</p> <ul style="list-style-type: none"> <li>- Significant differences in the microbial diversity among AIDS and pre-AIDS based on PCoA with Bray-Curtis dissimilarity and PERMANOVA</li> </ul>                                                                                                                                                                                                                                                                                     | <p>Disease severity and metabolites showed the following correlations:</p> <ul style="list-style-type: none"> <li>- L-tryptophan is positively correlated with <i>Enterococcus</i>, <i>Enterococcus durans</i> and <i>Lactobacillus</i> among PLHIV</li> <li>- Phenylethylamine is positively correlated with <i>Enterococcus</i> and <i>Enterococcus durans</i></li> </ul>                                                                                                                                                                                                                                                                                                                                                                     |



|                      |                                                                                                                                                                                                                                                                                                                                                                                                                                                                                                                                                                                                                                     |                                                                                                                                                                                                                                                                                                                                                                                                                                      |                                                                                                                                                                                                                                                                                                                                                                                                                                                                                                                                                                                                                                                                                                                                                                                                                                                                                                                                                                                                                                                                                                                                                                                                                                                                                                                                                                                                                                                                                                                                                                                                                                                                                                                                                                                                                                                                                                                                         |
|----------------------|-------------------------------------------------------------------------------------------------------------------------------------------------------------------------------------------------------------------------------------------------------------------------------------------------------------------------------------------------------------------------------------------------------------------------------------------------------------------------------------------------------------------------------------------------------------------------------------------------------------------------------------|--------------------------------------------------------------------------------------------------------------------------------------------------------------------------------------------------------------------------------------------------------------------------------------------------------------------------------------------------------------------------------------------------------------------------------------|-----------------------------------------------------------------------------------------------------------------------------------------------------------------------------------------------------------------------------------------------------------------------------------------------------------------------------------------------------------------------------------------------------------------------------------------------------------------------------------------------------------------------------------------------------------------------------------------------------------------------------------------------------------------------------------------------------------------------------------------------------------------------------------------------------------------------------------------------------------------------------------------------------------------------------------------------------------------------------------------------------------------------------------------------------------------------------------------------------------------------------------------------------------------------------------------------------------------------------------------------------------------------------------------------------------------------------------------------------------------------------------------------------------------------------------------------------------------------------------------------------------------------------------------------------------------------------------------------------------------------------------------------------------------------------------------------------------------------------------------------------------------------------------------------------------------------------------------------------------------------------------------------------------------------------------------|
|                      | <ul style="list-style-type: none"> <li>- Positive: <i>Enterococcus</i> and <i>Lactobacillus</i></li> <li>- Negative: <i>Faecalibacterium</i>, <i>Lachnospira</i>, <i>Ruminococcaceae_UCG-002</i>, <i>Roseburia</i> and <i>Dorea</i></li> </ul>                                                                                                                                                                                                                                                                                                                                                                                      | <ul style="list-style-type: none"> <li>- Gut microbial diversity in different stages of HIV infection can be clustered in three distinct clusters based on PLS-DA</li> </ul>                                                                                                                                                                                                                                                         | <ul style="list-style-type: none"> <li>- Niacinamide and fumaric acid are positively correlated with <i>Fusicatenibacter</i></li> <li>- Pyridoxine is positively correlated with <i>Bacteroides plebeius</i></li> </ul>                                                                                                                                                                                                                                                                                                                                                                                                                                                                                                                                                                                                                                                                                                                                                                                                                                                                                                                                                                                                                                                                                                                                                                                                                                                                                                                                                                                                                                                                                                                                                                                                                                                                                                                 |
| Zhu et al., 2022[28] | <p>HIV infection compared to healthy controls showed the following changes:</p> <ul style="list-style-type: none"> <li>- Increased: g_<i>Enterococcus</i>, g_<i>Escherichia-Shigella</i>, and g_<i>Erysipelatoclostridium</i></li> <li>- Decreased: g_<i>Betaproteobacteria_unclassified</i>, g_<i>Prevotella</i>, g_<i>Bacteroidetes_unclassified</i>, g_<i>Mitochondria_unclassified</i></li> </ul> <p>PCP comorbidity showed the following changes:</p> <ul style="list-style-type: none"> <li>- Increased: g_<i>Prevotella_9</i>, g_<i>Holdemanella</i>, g_<i>Catenibacterium</i>, and g_<i>Escherichia-Shigella</i></li> </ul> | <p>Alpha-diversity</p> <ul style="list-style-type: none"> <li>- No observed differences in diversity based on Chao1, Observed species, Goods_coverage, Shannon, Simpson, and other indices.</li> </ul> <p>Beta-diversity</p> <ul style="list-style-type: none"> <li>- Unweighted pair group method with arithmetic mean (UPGMA) analysis showed that samples formed two large clusters, namely different intestinal types</li> </ul> | <p>Clinical variables have the following correlations:</p> <ul style="list-style-type: none"> <li>- CD4 count is negatively correlated with g_<i>Faecalibacterium</i>, g_<i>Dialister</i>, g_<i>Prevotella_9</i>, g_<i>Parabacteroides</i></li> <li>- CD8 is positively correlated with g_<i>Catenibacterium</i>, g_<i>Parabacteroides</i>, g_<i>Prevotella_9</i></li> <li>- CD4/CD8 ratio is negatively correlated with g_<i>Faecalibacterium</i>, g_<i>Prevotella_9</i>, g_<i>Dialister</i>, g_<i>Parabacteroides</i></li> <li>- WBC count is positively correlated with g_<i>Blautia</i>, g_<i>Megamonas</i>, g_<i>Parabacteroides</i>, g_<i>Firmicutes_unclassified</i>, g_<i>Eggerthella</i> and g_<i>Phascolarctobacterium</i> and negatively correlated with g_<i>Erysipelatoclostridium</i> and g_<i>Sutterella</i></li> </ul> <p>Lung and gut microbiota composition showed the following findings:</p> <ul style="list-style-type: none"> <li>- Phylum level showed that <i>Firmicutes</i> were the most abundant component in the intestinal tract of HIV-infected patients (70.19%), and the relative abundance of <i>Firmicutes</i> in the lung was also high (30.48%; the most abundant <i>Proteobacteria</i> was 35.97%)</li> <li>- <i>Firmicutes</i> was the most abundant component in the intestinal tract (40.54%) in HIV+ (PCP-) patients, and the relative abundance of <i>Firmicutes</i> in the lung was also high (15.75%; the most abundant <i>Proteobacteria</i> was 58.42%)</li> <li>- <i>Firmicutes</i> was the most abundant component in the intestine of PCP+ patients (38.33%), and the relative abundance of <i>Firmicutes</i> in lungs was also high (28.24%; the abundance of <i>Proteobacteria</i> was 55.48%)</li> <li>- Genus-level sequencing analysis showed that <i>Streptococcus</i>, <i>Enterococcus</i>, and <i>Veillonella</i> were the most abundant genera in the gut and lung</li> </ul> |

|                       |                                                                                                                                                                                                                                                                                                                                                                                                                                                                                                                                                                                                                                                                                                                                                                     |                                                                                                                                                                                                                                                                                                                                                                                                                                                             |                                                                                                                                                                                                                                                                                                                                                                                                                                                                                                                                                                                                                                                                                                                                                                                                                                                                                                                                                                                                                                                                             |
|-----------------------|---------------------------------------------------------------------------------------------------------------------------------------------------------------------------------------------------------------------------------------------------------------------------------------------------------------------------------------------------------------------------------------------------------------------------------------------------------------------------------------------------------------------------------------------------------------------------------------------------------------------------------------------------------------------------------------------------------------------------------------------------------------------|-------------------------------------------------------------------------------------------------------------------------------------------------------------------------------------------------------------------------------------------------------------------------------------------------------------------------------------------------------------------------------------------------------------------------------------------------------------|-----------------------------------------------------------------------------------------------------------------------------------------------------------------------------------------------------------------------------------------------------------------------------------------------------------------------------------------------------------------------------------------------------------------------------------------------------------------------------------------------------------------------------------------------------------------------------------------------------------------------------------------------------------------------------------------------------------------------------------------------------------------------------------------------------------------------------------------------------------------------------------------------------------------------------------------------------------------------------------------------------------------------------------------------------------------------------|
| Dong et al., 2021[29] | <p>NCI compared to non-NCI PLHIV showed the following changes:</p> <ul style="list-style-type: none"> <li>- Increased: Spirochaetes and Epsilonbacteraeota phyla and <i>Klebsiella</i>, <i>Alloprevotella</i>, <i>Catenibacterium</i>, Coriobacteriales, <i>Streptococcus</i>, Lactobacillales, and Campylobacteriales</li> <li>- Decreased: <i>Succinivibrio</i>, <i>Faecalibacterium</i>, <i>Ruminococcus_1</i>, <i>Coprococcus_2</i>, and Bacteroidales_RF16_group genera</li> </ul>                                                                                                                                                                                                                                                                             | <p>Alpha-diversity</p> <ul style="list-style-type: none"> <li>- No significant difference between the NCI and non-NCI groups based on Shannon, Simpson, and Chao indices</li> </ul> <p>Beta-diversity</p> <ul style="list-style-type: none"> <li>- No significant differences in the microbial communities of both groups based on unweighted and weighted UniFrac distance matrices</li> </ul>                                                             | <p>Clinical parameters showed the following correlations:</p> <ul style="list-style-type: none"> <li>- CD4 count is inversely correlated with <i>Streptococcus</i> and <i>Treponema_2</i></li> <li>- Left CIMT is positively correlated with <i>Klebsiella</i> and inversely correlated with <i>Faecalibacterium</i>, <i>Ruminococcus_1</i>, <i>Coprococcus_2</i>, and <i>Ruminococcaceae_NK4A214_group</i></li> <li>- Right CIMT is positively correlated with <i>Klebsiella</i> and inversely correlated with <i>Faecalibacterium</i></li> </ul> <p>Gut metabolites and plasma 25(OH)D have the following associations:</p> <ul style="list-style-type: none"> <li>- Bile acids, glycerophosphoinositols, fatty acids, eicosanoids, and fatty amides are positively correlated with <i>Klebsiella</i> and negatively correlated with <i>Faecalibacterium</i>, <i>Ruminococcus_1</i>, and <i>Coprococcus_2</i></li> <li>- Plasma 25(OH)D is positively associated with <i>Faecalibacterium</i>, <i>Coprococcus_2</i>, and <i>Ruminococcaceae_NK4A214_groups</i></li> </ul> |
| Ji et al., 2018[30]   | <p>Use of ART among PLHIV showed the following changes:</p> <ul style="list-style-type: none"> <li>- Increased: Proteobacteria and Fusobacteria phyla, Gammaproteobacteria and Fusobacteria classes, <i>Enterobacteriales</i> and <i>Fusobacteriales</i> orders, <i>Enterobacteriaceae</i> and <i>Fusobacteriaceae</i> families, and <i>Klebsiella</i> and <i>Fusobacterium</i> genera</li> <li>- Decreased: Bacteroidetes (Bacteroidia class and Bacteroidales order) and Firmicutes (<i>Ruminococcaceae</i> and <i>Faecalibacterium</i>)</li> </ul> <p>Use of ART among PLHIV with low CD4 count showed the following changes:</p> <ul style="list-style-type: none"> <li>- Increased: Bacillales (Family_XII_o_Bacillales and <i>Exiguobacterium</i>)</li> </ul> | <p>Alpha-diversity</p> <ul style="list-style-type: none"> <li>- PLHIV with low CD4 count compared to those with high CD4 count have significantly lower diversity based on Shannon and Simpson indices</li> <li>- ART among PLHIV with low CD4 count significantly restored the diversity based on Shannon and Simpson indices</li> <li>- ART among PLHIV with high CD4 count caused non-significant decrease in diversity</li> </ul> <p>Beta-diversity</p> |                                                                                                                                                                                                                                                                                                                                                                                                                                                                                                                                                                                                                                                                                                                                                                                                                                                                                                                                                                                                                                                                             |

|                           |                                                                                                                                                                                                                                                                                                                                                                                                                                                                                                                                                                                                                                                                                                                                                                                                                                                                                                                                                                                                                                                                                                                        |                                                                                                                                                                                                                                                                                                                                                                                                                                                                                                                                                                         |                                                                                                                                                                                                                                                                                                                                                                                                                                                                                                                                                      |
|---------------------------|------------------------------------------------------------------------------------------------------------------------------------------------------------------------------------------------------------------------------------------------------------------------------------------------------------------------------------------------------------------------------------------------------------------------------------------------------------------------------------------------------------------------------------------------------------------------------------------------------------------------------------------------------------------------------------------------------------------------------------------------------------------------------------------------------------------------------------------------------------------------------------------------------------------------------------------------------------------------------------------------------------------------------------------------------------------------------------------------------------------------|-------------------------------------------------------------------------------------------------------------------------------------------------------------------------------------------------------------------------------------------------------------------------------------------------------------------------------------------------------------------------------------------------------------------------------------------------------------------------------------------------------------------------------------------------------------------------|------------------------------------------------------------------------------------------------------------------------------------------------------------------------------------------------------------------------------------------------------------------------------------------------------------------------------------------------------------------------------------------------------------------------------------------------------------------------------------------------------------------------------------------------------|
|                           |                                                                                                                                                                                                                                                                                                                                                                                                                                                                                                                                                                                                                                                                                                                                                                                                                                                                                                                                                                                                                                                                                                                        | <ul style="list-style-type: none"> <li>- Microbial community profiles among PLHIV before and during treatment with ART are statistically distinct based on Adonis analysis of weighted UniFrac distance metric and principal-coordinate analysis</li> </ul>                                                                                                                                                                                                                                                                                                             |                                                                                                                                                                                                                                                                                                                                                                                                                                                                                                                                                      |
| Ling et al., 2016[31]     | <p>PLHIV compared to healthy controls showed the following changes:</p> <ul style="list-style-type: none"> <li>- Increased: Firmicutes and Proteobacteria phyla, <i>Prevotella</i>, <i>Faecalibacterium</i>, <i>Phascolarctobacterium</i>, <i>Butyrivibrio</i>, <i>Erysipelotrichaceae</i> incertae sedis, <i>Catenibacterium</i>, <i>Dorea</i>, <i>Enterobacter</i>, <i>Enterococcus</i> and <i>Megamonas</i> genera</li> <li>- Decreased: Bacteroidetes phyla, <i>Bacteroides</i>, <i>Dialister</i>, <i>Clostridium</i> XIVa, <i>Clostridium</i> XIVb, <i>Barnesiella</i> and <i>Coprococcus</i> genera</li> </ul> <p>Use of ART among PLHIV showed the following changes:</p> <ul style="list-style-type: none"> <li>- Increased: Bacteroidetes and Synergistetes phyla, <i>Prevotella</i>, <i>Faecalibacterium</i>, <i>Alistipes</i>, <i>Oscillibacter</i>, <i>Barnesiella</i>, <i>Dialister</i> and <i>Odoribacter</i> genera</li> <li>- Decreased: Firmicutes and Proteobacteria phyla, <i>Megamonas</i>, <i>Veillonella</i>, <i>Blautia</i>, <i>Clostridium</i> XVIII and <i>Enterococcus</i> genera</li> </ul> | <p>Alpha-diversity</p> <ul style="list-style-type: none"> <li>- No statistically significant differences between the microbial diversity among PLHIV and healthy controls based on Shannon and Simpson indices</li> </ul> <p>Beta-diversity</p> <ul style="list-style-type: none"> <li>- Microbial communities among PLHIV are significantly different compared to healthy controls based on principal coordinate analysis</li> <li>- No statistical difference in microbial communities of untreated and treated PLHIV based on unweighted UniFrac analysis</li> </ul> | <p>Inflammatory cytokines have the following correlations:</p> <ul style="list-style-type: none"> <li>- TNF-<math>\alpha</math> is positively correlated with <i>Phascolarctobacterium</i></li> <li>- IL-6 is positively correlated with <i>Megamonas</i></li> <li>- IL-22 is positively correlated with <i>Dialister</i></li> <li>- IFN-<math>\gamma</math> is negatively correlated with <i>Clostridium</i> XIVb</li> </ul>                                                                                                                        |
| Imahashi et al., 2021[32] | <p>PLHIV compared to healthy controls showed the following changes:</p> <ul style="list-style-type: none"> <li>- Increased: <i>Prevotella</i></li> <li>- Decreased: <i>Bacteroides</i>, <i>Faecalibacterium</i>, and <i>Lachnospiraceae</i></li> </ul> <p>Long-term ART was associated with the following:</p>                                                                                                                                                                                                                                                                                                                                                                                                                                                                                                                                                                                                                                                                                                                                                                                                         | <p>Alpha-diversity</p> <ul style="list-style-type: none"> <li>- PLHIV has increased species-richness estimates (Chao1 indices) compared to healthy</li> <li>- Noted decreased diversity over time in ART; inversely</li> </ul>                                                                                                                                                                                                                                                                                                                                          | <p>Salivary microbiome of PLHIV showed the following:</p> <ul style="list-style-type: none"> <li>- No significant differences in <i>Prevotella</i>, <i>Streptococcus</i>, and <i>Veillonella</i> compared to healthy</li> <li>- No noted increase in periodontal-disease-related genera such as <i>Porphyromonas</i>, <i>Actinomyces</i>, <i>Treponema</i>, <i>Aggregatibacter</i>, <i>Shuttleworthia</i>, <i>Gemella</i>, <i>Dialister</i>, and <i>Granulicatella</i></li> <li>- No significant changes in diversity compared to healthy</li> </ul> |

|                           |                                                                                                                                                                                                                                                                                                                                                                                                                                                                                                            |                                                                                                                                                                                                                                                                                                                                                                                                                                                                                                                      |                                                                                                                                                                                                                                                                                                                                                                                                                                                                                                                                                                                                                                                                                                                                                                                                                                                                                                                                                                                                                                                                                                                                             |
|---------------------------|------------------------------------------------------------------------------------------------------------------------------------------------------------------------------------------------------------------------------------------------------------------------------------------------------------------------------------------------------------------------------------------------------------------------------------------------------------------------------------------------------------|----------------------------------------------------------------------------------------------------------------------------------------------------------------------------------------------------------------------------------------------------------------------------------------------------------------------------------------------------------------------------------------------------------------------------------------------------------------------------------------------------------------------|---------------------------------------------------------------------------------------------------------------------------------------------------------------------------------------------------------------------------------------------------------------------------------------------------------------------------------------------------------------------------------------------------------------------------------------------------------------------------------------------------------------------------------------------------------------------------------------------------------------------------------------------------------------------------------------------------------------------------------------------------------------------------------------------------------------------------------------------------------------------------------------------------------------------------------------------------------------------------------------------------------------------------------------------------------------------------------------------------------------------------------------------|
|                           | <ul style="list-style-type: none"> <li>- ART especially NRTI-based regimens result in higher changes in abundance in increase of <i>Prevotella</i> and decrease in <i>Bacteroides</i></li> <li>- Time-course increase in <i>Succinivibrio</i> and <i>Megasphaera</i>. No increase in <i>Clostridium</i></li> </ul>                                                                                                                                                                                         | <p>correlated with ART especially NRTI(+) regimens</p> <p>Beta-diversity</p> <ul style="list-style-type: none"> <li>- PLHIV especially those using NRTI-based regimen has increased beta-diversity based on weighted UniFrac distances compared to healthy controls</li> </ul>                                                                                                                                                                                                                                       |                                                                                                                                                                                                                                                                                                                                                                                                                                                                                                                                                                                                                                                                                                                                                                                                                                                                                                                                                                                                                                                                                                                                             |
| Ishizaka et al., 2021[33] | <p>High CD4 PLHIV compared to healthy controls showed the following changes:</p> <ul style="list-style-type: none"> <li>- Increased: Actinobacteria, <i>Prevotella</i>, Negativicutes (<i>Dialister</i>, <i>Megamonas</i>, and <i>Acidaminococcaceae</i>), Coriobacteriia (<i>Collinsella</i> and <i>Slackia</i>), and Bacilli (<i>Catenibacterium</i> and <i>Holdemanella</i>)</li> <li>- Decreased: <i>Bacteroides</i> and <i>Clostridia</i> (<i>Ruminococcaceae</i> and <i>Anaerostipes</i>)</li> </ul> | <p>Alpha-diversity</p> <ul style="list-style-type: none"> <li>- Low CD4 PLHIV compared to healthy controls have decreased diversity based on Shannon index</li> <li>- ART showed varying degrees of restoration of bacterial richness based on Shannon index</li> </ul> <p>Beta-diversity</p> <ul style="list-style-type: none"> <li>- Bacterial communities between high CD4 and healthy controls are statistically significant based on Weighted UniFrac distance and its principal-coordinate analysis</li> </ul> | <p>Functional microbiome profiles showed the following associations:</p> <ul style="list-style-type: none"> <li>- <i>Eggerthella</i> (class <i>Coriobacteriia</i>) and <i>Holdemanella</i> (class <i>Bacilli</i>) are directly associated with elevated triglycerides and decreased high-density lipoproteins</li> </ul> <p>Patient and clinical parameters have the following associations:</p> <ul style="list-style-type: none"> <li>- Age is positively correlated with class <i>Coriobacteriia</i> and families <i>Coriobacteriaceae</i> and <i>Eggerthellaceae</i> among healthy controls but not among PLHIV</li> <li>- IFN-<math>\gamma</math>, IL-4, and IL-1<math>\beta</math> are positively correlated with Negativicutes (<i>Acidaminococcales</i>, <i>Acidaminococcaceae</i>, and <i>Veillonellaceae</i>)</li> <li>- Chemokines targeting monocytes are positively correlated with <i>Erysipelotrichales</i>, and some under <i>Negativicutes</i></li> <li>- IL-19 and IL-35 are negatively correlated with families <i>Erysipelotrichaceae</i> in <i>Bacilli</i> and <i>Atopobiaceae</i> in <i>Coriobacteriia</i></li> </ul> |
| Ishizaka et al., 2021[34] | <p>HAV coinfection among PLHIV showed the following changes:</p> <ul style="list-style-type: none"> <li>- Increase at onset: Fusobacteria and Desulfobacterota</li> <li>- Changes over-time: increased Actinobacteria or Bacteroidota (<i>Bifidobacterium</i> and <i>Bacteroides</i>) and decreased Proteobacteria</li> </ul>                                                                                                                                                                              | <p>Alpha-diversity</p> <ul style="list-style-type: none"> <li>- Significant transient elevations followed by decrease in diversity were observed during HAV coinfection based on observed OTUs and Shannon index</li> </ul>                                                                                                                                                                                                                                                                                          |                                                                                                                                                                                                                                                                                                                                                                                                                                                                                                                                                                                                                                                                                                                                                                                                                                                                                                                                                                                                                                                                                                                                             |

|                           |                                                                                                                                                                                                                                                                                                                                                                                                                                                                                                                                                                                                                                                               |                                                                                                                                                                                                                                                                                                                                                                                                                                                                                                                                                             |  |
|---------------------------|---------------------------------------------------------------------------------------------------------------------------------------------------------------------------------------------------------------------------------------------------------------------------------------------------------------------------------------------------------------------------------------------------------------------------------------------------------------------------------------------------------------------------------------------------------------------------------------------------------------------------------------------------------------|-------------------------------------------------------------------------------------------------------------------------------------------------------------------------------------------------------------------------------------------------------------------------------------------------------------------------------------------------------------------------------------------------------------------------------------------------------------------------------------------------------------------------------------------------------------|--|
|                           | <ul style="list-style-type: none"> <li>- At phylum level, microbiome composition became similar to PLHIV without HAV infection after 100 days</li> </ul>                                                                                                                                                                                                                                                                                                                                                                                                                                                                                                      |                                                                                                                                                                                                                                                                                                                                                                                                                                                                                                                                                             |  |
| Jayanama et al., 2022[35] | <p>Prediabetes PLHIV compared to normoglycemia PLHIV showed the following changes:</p> <ul style="list-style-type: none"> <li>- Increased: Firmicutes (<i>Streptococcus</i> and <i>Anaerostignum</i>)</li> <li>- Decreased: Firmicutes, Bacteroidota, Cyanobacteria, Desulfobacterota, Verrucomicrobiota, Akkermansia, Gastranaerophilales, <i>Desulfovibrio</i>, <i>Butyricimonas</i>, <i>Colidextribacter</i>, Christensenellaceae R 7 group, <i>Victivallis</i>, Uncultured Bacteroidota, Uncultured phylum Firmicutes, <i>Holdemanella</i>, UCG-005, <i>Eubacterium ruminantium</i> group, and family <i>Oscillospiraceae</i>-associated group</li> </ul> | <p>Alpha-diversity</p> <ul style="list-style-type: none"> <li>- Significantly lower diversity among pre-diabetes PLHIV compared to normoglycemia PLHIV based on Shannon index, Faith's phylogenetic diversity, observed OTUs richness, and Evenness</li> </ul> <p>Beta-diversity</p> <ul style="list-style-type: none"> <li>- Microbial communities between normoglycemia and pre-diabetes PLHIV have significant clustering based on PerMANOVA of unweighted UniFrac but is not significant based on Bray-Curtis, Jaccard, and weighted UniFrac</li> </ul> |  |
| Mak et al., 2021[36]      | <p>Both CHI and PHI have the following changes:</p> <ul style="list-style-type: none"> <li>- High abundance of <i>Faecalibacterium</i>, <i>Prevotella</i>, and <i>Bacteroides</i></li> </ul> <p>PHI compared to CHI showed the following changes:</p> <ul style="list-style-type: none"> <li>- Increase: <i>Spirochaeta</i> spp.</li> <li>- CHI has a non-significant increase in <i>Acidaminococcus</i> spp., increasing abundance of <i>Prevotella</i>, and decreasing <i>Faecalibacterium</i></li> </ul>                                                                                                                                                   | <p>Alpha-diversity</p> <ul style="list-style-type: none"> <li>- More even distribution in microbiome of healthy compared to PLHIV based on Simpson index</li> <li>- PLHIV has a non-significant decreasing trend in species richness based on Shannon diversity index H'</li> </ul> <p>Beta-diversity</p> <ul style="list-style-type: none"> <li>- No significant difference between groups in overall microbiota composition</li> </ul>                                                                                                                    |  |

|  |  |                                                                    |  |
|--|--|--------------------------------------------------------------------|--|
|  |  | based on Bray Curtis<br>dissimilarity, as assessed by<br>PERMANOVA |  |
|--|--|--------------------------------------------------------------------|--|

AIDS = acquired immunodeficiency syndrome, ART = antiretroviral therapy, CD4 = CD4+ T-cell count, CHI = chronic HIV infection, CIMT = carotid intima-media thickness, HAV = hepatitis A virus INR = immune non-responders, IR = immune responders, NCI = neurocognitive impairment, NRTI = nucleoside reverse transcriptase inhibitor, PCP = pneumocystis pneumonia, PHI = primary HIV infection, PI = protease inhibitor, PLHIV = people living with HIV, SCFA = short-chain fatty acids
